# Supplementary material for: The rapid detection of bioavailable micronutrients Cu/Fe/Zn/Mn in soil using laser-induced breakdown spectroscopy combined with solid–liquid–solid transformation
Source: Royal Society of Chemistry journal article supplement (doi:10.1039/d5ja00341e), 2025-10-29
Supplement: d5ja00341e1.pdf [file d5ja00341e1.pdf]

## **Supporting information for**

# **The Rapid Detection of Bioavailable Micronutrients Cu/Fe/Zn/Mn in Soil Using Laser-Induced Breakdown Spectroscopy Combined with Solid-Liquid-Solid Transformation**

Yangrui Li<sup>abc</sup>, Zhizheng Shi<sup>bc</sup>, Leizi Jiao<sup>bc</sup>, Ning Liu<sup>bc</sup>, Zhen Xing<sup>bc</sup>, Shixiang Ma<sup>bc</sup>,  
Hongwu Tian<sup>\*bc</sup>, Daming Dong<sup>\*abc</sup>

<sup>a</sup> School of Optoelectronic Engineering, Guilin University of Electronic Technology,  
Guilin 541010, China

<sup>b</sup> Research Center of Intelligent Equipment, Beijing Academy of Agriculture and  
Forestry Sciences, Beijing, 100097, China

<sup>c</sup> Key Laboratory of Agricultural Sensors, Ministry of Agriculture and Rural Affairs,  
Beijing 100097, China

\*Author for correspondence: Hongwu Tian

E-mail: tianhw@nrcita.org.cn

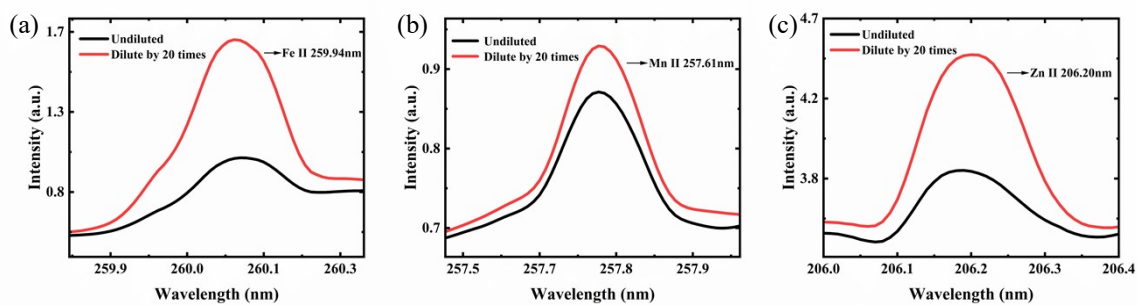

Fig. S1. (a)-(c) Comparison of target element signal intensities of soil extract samples before dilution and after dilution by 20 times

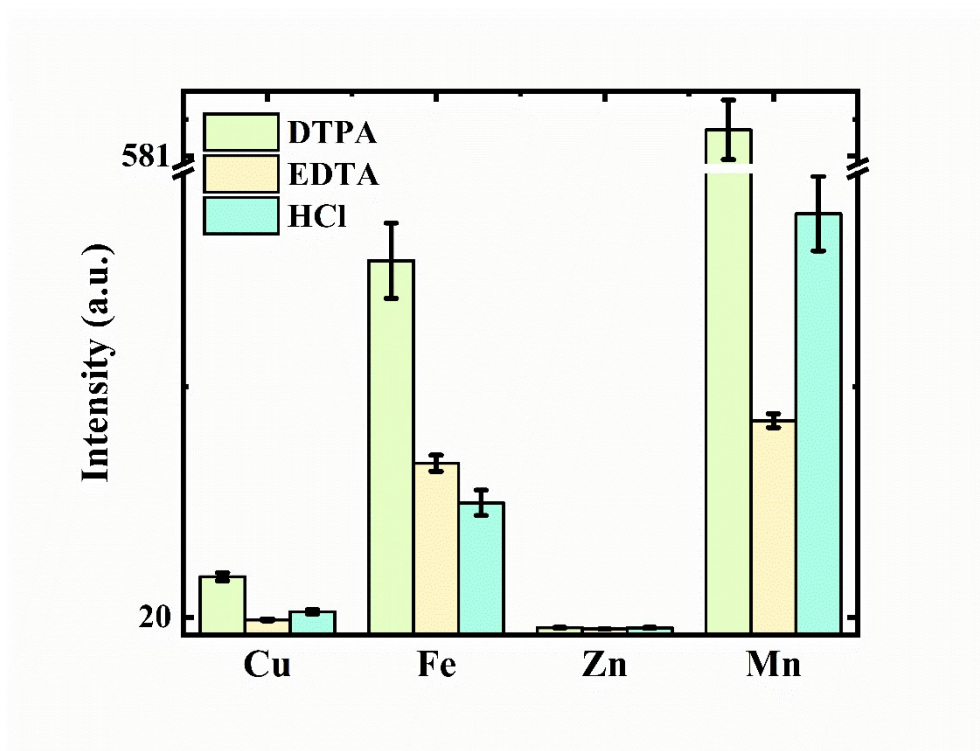

Fig. S2. Comparison of spectral intensities obtained from soil extraction with three extractants

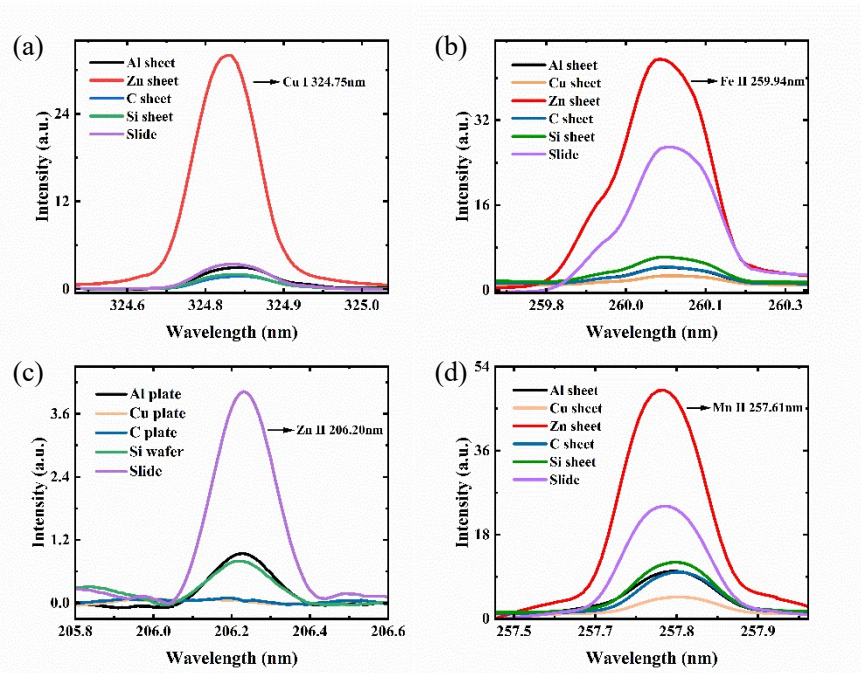

Fig. S3. (a)-(d) Comparison of spectral intensities of target elements at different substrates

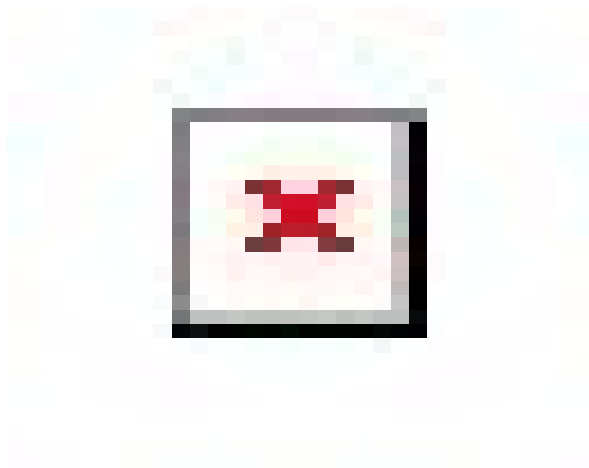

Fig. S4. (a)-(d) Effect of liquid-soil ratio on spectral intensity

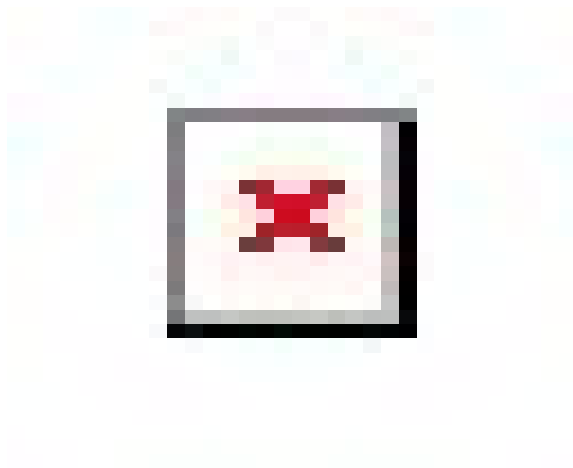

Fig. S5. (a)-(d) Effect of different oscillation times on spectral intensity

Table S1. Soil validation set and recovery rate calculation

| Simple No.    | Element(content) | Added(mg/kg) | Found   | Recovery |
|---------------|------------------|--------------|---------|----------|
| Soil sample 2 | Cu(0.456mg/kg)   | 0            | 0.440   | 96.4%    |
|               |                  | 6            | 6.895   | 106.8%   |
|               |                  | 30           | 26.375  | 86.6%    |
|               | Fe(0.901 mg/kg)  | 0            | 1.088   | 120.7%   |
|               |                  | 6            | 5.838   | 84.6%    |
|               |                  | 30           | 27.595  | 89.3%    |
|               | Zn(0.477mg/kg)   | 20           | 19.207  | 93.8%    |
|               |                  | 80           | 93.756  | 116.5%   |
|               |                  | 200          | 167.999 | 83.8%    |
|               | Mn(3.779mg/kg)   | 0            | 4.595   | 121.6%   |
|               |                  | 6            | 11.031  | 112.8%   |
|               |                  | 30           | 32.799  | 97.1%    |
| Soil sample 3 | Cu(0.670mg/kg)   | 0            | 0.661   | 98.6%    |
|               |                  | 6            | 7.490   | 112.3%   |
|               |                  | 30           | 36.313  | 118.4%   |
|               | Fe(3.146mg/kg)   | 0            | 2.809   | 89.3%    |
|               |                  | 6            | 9.942   | 108.7%   |
|               |                  | 30           | 28.605  | 86.3%    |
|               | Zn(2.961mg/kg)   | 20           | 22.410  | 97.6%    |
|               |                  | 80           | 82.297  | 99.2%    |
|               |                  | 200          | 219.807 | 108.3%   |
|               | Mn(12.592mg/kg)  | 0            | 12.416  | 98.6%    |
|               |                  | 6            | 16.119  | 86.7%    |
|               |                  | 30           | 36.161  | 84.9%    |
| Soil sample 4 | Cu(0.789mg/kg)   | 0            | 0.748   | 94.8%    |
|               |                  | 6            | 6.361   | 93.7%    |
|               |                  | 30           | 32.821  | 106.6%   |
|               | Fe(4.650mg/kg)   | 0            | 5.436   | 116.9%   |
|               |                  | 6            | 10.022  | 94.1%    |
|               |                  | 30           | 38.739  | 111.8%   |
|               | Zn(1.512mg/kg)   | 20           | 20.415  | 94.9%    |
|               |                  | 80           | 66.514  | 81.6%    |
|               |                  | 200          | 198.89  | 98.7%    |
|               | Mn(7.118mg/kg)   | 0            | 6.677   | 93.8%    |
|               |                  | 6            | 14.023  | 106.9%   |
|               |                  | 30           | 41.721  | 112.4%   |
